# Supplementary material for: Differential Behavior within a Grapevine Cluster: Decreased Ethylene-Related Gene Expression Dependent on Auxin Transport Is Correlated with Low Abscission of First Developed Berries
Source: PubMed Central journal article supplement (PMC4218718; doi:10.1371/journal.pone.0111258), 2014-11-03
Supplement: pone.0111258.s001.pdf [file pone.0111258.s001.pdf]

Supplementary Table S1. RT-qPCR Ct values for *VvUBI1* and *VvGPDH* genes in berry category 1 and 4 at 12 DAF, and in NPA (N) and control (C) berries at 16 DAF. Three biological and three technical replicates were performed.

| <i>VvUBI1</i> |          |            |          | <i>VvGPDH</i> |          |            |          |
|---------------|----------|------------|----------|---------------|----------|------------|----------|
| Replicates    | Ct (dRn) | Replicates | Ct (dRn) | Replicates    | Ct (dRn) | Replicates | Ct (dRn) |
| 1.1           | 19.67    | N.1        | 19.7     | 1.1           | 19.98    | N.1        | 19.56    |
| 1.1           | 19.69    | N.1        | 19.84    | 1.1           | 19.84    | N.1        | 19.61    |
| 1.1           | 19.68    | N.1        | 19.66    | 1.1           | 19.8     | N.1        | 19.47    |
| 1.2           | 21.86    | N.3        | 19.33    | 1.2           | 20.82    | N.2        | 19.53    |
| 1.2           | 21.04    | N.3        | 19.48    | 1.2           | 20.96    | N.2        | 19.4     |
| 1.2           | 21.21    | N.3        | 19.61    | 1.2           | 21       | N.2        | 19.43    |
| 1.3           | 20.46    | N.2        | 19.42    | 1.3           | 19.6     | N.3        | 19.18    |
| 1.3           | 20.65    | N.2        | 19.48    | 1.3           | 19.92    | N.3        | 19.19    |
| 1.3           | 20.74    | N.2        | 19.26    | 1.3           | 19.87    | N.3        | 19.39    |
| 4.1           | 20.37    | C.1        | 21.12    | 4.1           | 20.1     | C.1        | 20.37    |
| 4.1           | 20.16    | C.1        | 21.11    | 4.1           | 20.1     | C.1        | 19.51    |
| 4.1           | 20.49    | C.1        | 21.12    | 4.1           | 20.1     | C.1        | 19.98    |
| 4.2           | 19.55    | C.2        | 21.14    | 4.2           | 19.46    | C.2        | 20.52    |
| 4.2           | 19.65    | C.2        | 21.25    | 4.2           | 19.33    | C.2        | 21.24    |
| 4.2           | 19.61    | C.2        | 21.17    | 4.2           | 19.29    | C.2        | 21.28    |
| 4.3           | 19.5     | C.3        | 21.08    | 4.3           | 19.49    | C.3        | 19.83    |
| 4.3           | 19.35    | C.3        | 21.14    | 4.3           | 19.61    | C.3        | 20.04    |
| 4.3           | 20.11    | C.3        | 21.22    | 4.3           | 19.64    | C.3        | 19.29    |
